# Supplementary material for: Venetoclax with Hypomethylating Agents in Newly Diagnosed Acute Myeloid Leukemia: A Systematic Review and Meta-Analysis of Survival Data from Real-World Studies
Source: MDPI journal article supplement (doi:10.3390/cancers15184618), 2023-09-18
Supplement: s1 [file s1]

## Supplementary Materials

**Table S1. Baseline clinical characteristics of the patients.**

| Study                     | ELN<br>intermediate<br>- % | Normal<br>karyotype -<br>% | Bone marrow<br>blasts –<br>% (range) | Hemoglobin<br>(g/dl) –<br>mean (range) | White blood<br>cells (10 <sup>3</sup> /μl) –<br>mean (range) | Platelets<br>(10 <sup>3</sup> /μl) –<br>mean (range) |
|---------------------------|----------------------------|----------------------------|--------------------------------------|----------------------------------------|--------------------------------------------------------------|------------------------------------------------------|
| Aiba, 2023 [28]           | nr                         | nr                         | nr                                   | nr                                     | nr                                                           | nr                                                   |
| Apel, 2021 [29]           | 42                         | 35                         | 40                                   | 9                                      | 5                                                            | 73                                                   |
| Begna, 2021 [30]          | nr                         | nr                         | nr                                   | nr                                     | nr                                                           | nr                                                   |
| Cherry, 2021 [31]         | 17                         | nr                         | 50<br>(10-97)                        | nr                                     | nr                                                           | nr                                                   |
| De Bellis, 2022<br>[21]   | 55                         | 38                         | 55<br>(20-100)                       | 9<br>(4-15)                            | 5<br>(<1-109)                                                | 39<br>(7-351)                                        |
| Feld, 2021 [32]           | 43                         | nr                         | 25                                   | 9                                      | 5                                                            | 58                                                   |
| Fleishmann, 2022<br>[33]  | 30                         | 32                         | nr                                   | nr                                     | 12<br>(<1-317)                                               | nr                                                   |
| Garciaz, 2022 [34]        | nr                         | nr                         | 36<br>(7-88)                         | nr                                     | 4<br>(<1-63)                                                 | 90<br>(3-365)                                        |
| Kwang, 2022 [35]          | 61                         | nr                         | 51                                   | nr                                     | nr                                                           | nr                                                   |
| Matthews, 2022<br>[26]    | nr                         | nr                         | nr                                   | nr                                     | nr                                                           | nr                                                   |
| Mirgh, 2021 [36]          | 63                         | 42                         | nr                                   | 8<br>(5-11)                            | nr                                                           | nr                                                   |
| Morsia, 2020 [37]         | 27                         | 41                         | 35<br>(20-95)                        | 9<br>(5-14)                            | 4<br>(1-97)                                                  | 73<br>(10-444)                                       |
| Mustafa Ali, 2022<br>[38] | 82                         | nr                         | nr                                   | nr                                     | nr                                                           | nr                                                   |
| Salhotra, 2021<br>[39]    | 20                         | nr                         | 41<br>(20-90)                        | nr                                     | 15<br>(<1-127)                                               | 110<br>(6-771)                                       |
| Shah, 2022 [40]           | nr                         | nr                         | 27                                   | 9                                      | 3                                                            | 87                                                   |
| Todisco, 2023<br>[24]     | 54                         | nr                         | 40                                   | 9                                      | 6                                                            | 43                                                   |
| Vachhani, 2022<br>[27]    | 22                         | nr                         | nr                                   | nr                                     | nr                                                           | nr                                                   |
| Venugopal, 2021<br>[41]   | nr                         | 3                          | 33<br>(8-88)                         | nr                                     | 3<br>(1-73)                                                  | 34<br>(5-136)                                        |
| Winters, 2019<br>[42]     | 10                         | nr                         | 55                                   | nr                                     | 3                                                            | nr                                                   |
| DiNardo, 2020<br>[14]     | nr                         | 44                         | <30%<br>30%-50%<br>50%               | 30%<br>21%<br>49%                      | With Anemia<br>31%                                           | With<br>Neutropenia<br>72%                           |
|                           |                            |                            |                                      |                                        |                                                              | With<br>Thrombocytopenia<br>51%                      |

ELN: European LeukemiaNet risk classification; nr not reported for the considered subgroup.

**Table S2. Reported Adverse Events (AE).**

| <b>Study</b>           | <b>N.<br/>patients</b> | <b>Neutropenia<br/>grade 3/4<br/>- %</b> | <b>Thrombocytopenia<br/>- %</b> | <b>Febrile neutropenia<br/>- %</b> | <b>TLS - %</b> | <b>Discontinuation<br/>for AE - %</b> |
|------------------------|------------------------|------------------------------------------|---------------------------------|------------------------------------|----------------|---------------------------------------|
| Aiba, 2023 [28]        | 13                     | nr                                       | nr                              | 80                                 | nr             | nr                                    |
| Apel, 2021 [29]        | 133                    | 88                                       | 75                              | 62                                 | 12             | 8                                     |
| Begna, 2021 [30]       | 28                     | nr                                       | nr                              | nr                                 | nr             | nr                                    |
| Cherry, 2021 [31]      | 143                    | nr                                       | nr                              | nr                                 | nr             | nr                                    |
| De Bellis, 2022 [21]   | 51                     | 29                                       | 14                              | 13                                 | 0              | 55                                    |
| Feld, 2021 [32]        | 72                     | 72                                       | nr                              | 47                                 | 6              | 35                                    |
| Fleishmann, 2022 [33]  | 17                     | 45                                       | 15                              | nr                                 | 12             | 29                                    |
| Garciaz, 2022 [34]     | 39                     | nr                                       | nr                              | nr                                 | nr             | nr                                    |
| Kwang, 2022 [35]       | 74                     | nr                                       | nr                              | nr                                 | 1              | 7                                     |
| Matthews, 2022 [26]    | 129                    | 31                                       | 30                              | 54                                 | nr             | nr                                    |
| Mirgh, 2021 [36]       | 24                     | 70                                       | 38                              | 33                                 | 1.8            | 66                                    |
| Morsia, 2020 [37]      | 44                     | nr                                       | nr                              | nr                                 | nr             | 30                                    |
| Mustafa Ali, 2022 [38] | 51                     | nr                                       | nr                              | nr                                 | nr             | nr                                    |
| Salhotra, 2021 [39]    | 30                     | nr                                       | nr                              | nr                                 | nr             | nr                                    |
| Shah, 2022 [40]        | 48                     | nr                                       | nr                              | nr                                 | nr             | nr                                    |
| Todisco, 2023 [24]     | 43                     | 37                                       | 21                              | 19                                 | 0              | 11                                    |
| Vachhani, 2022 [27]    | 169                    | 26                                       | nr                              | nr                                 | nr             | 12                                    |
| Venugopal, 2021 [41]   | 58                     | nr                                       | nr                              | nr                                 | nr             | nr                                    |
| Winters, 2019 [42]     | 30                     | 93                                       | 90                              | 47                                 | nr             | nr                                    |
| DiNardo, 2020 [14]     | 286                    | 42                                       | 45                              | 42                                 | 1              | 24                                    |

nr: not reported for the considered subgroup; TLS: tumor lysis syndrome.

**Table S3.** *p*-values of the log-rank test for the pairwise comparisons between single studies and DiNardo et al.

| <b>Study</b>           | <b>p-value</b> |
|------------------------|----------------|
| Aiba, 2023 [28]        | 0.5651         |
| Apel, 2021 [29]        | 0.0136         |
| Begna, 2021 [30]       | 0.1734         |
| Cherry, 2021 [31]      | 0.5787         |
| De Bellis, 2022 [21]   | 0.5207         |
| Feld, 2021 [32]        | 0.0873         |
| Fleishmann, 2022 [33]  | 0.6061         |
| Garciaz, 2022 [34]     | 0.0585         |
| Kwang, 2022 [35]       | 0.6534         |
| Matthews, 2022 [26]    | 0.0259         |
| Mirgh, 2021 [36]       | 0.4590         |
| Morsia, 2020 [37]      | 0.1707         |
| Mustafa Ali, 2022 [38] | 0.0013         |
| Salhotra, 2021 [39]    | 0.3333         |
| Shah, 2022 [40]        | 0.1420         |
| Todisco, 2023 [24]     | 0.0249         |
| Vachhani, 2022 [27]    | <0.0001        |
| Venugopal, 2021 [41]   | <0.0001        |
| Winters, 2019 [42]     | 0.0001         |

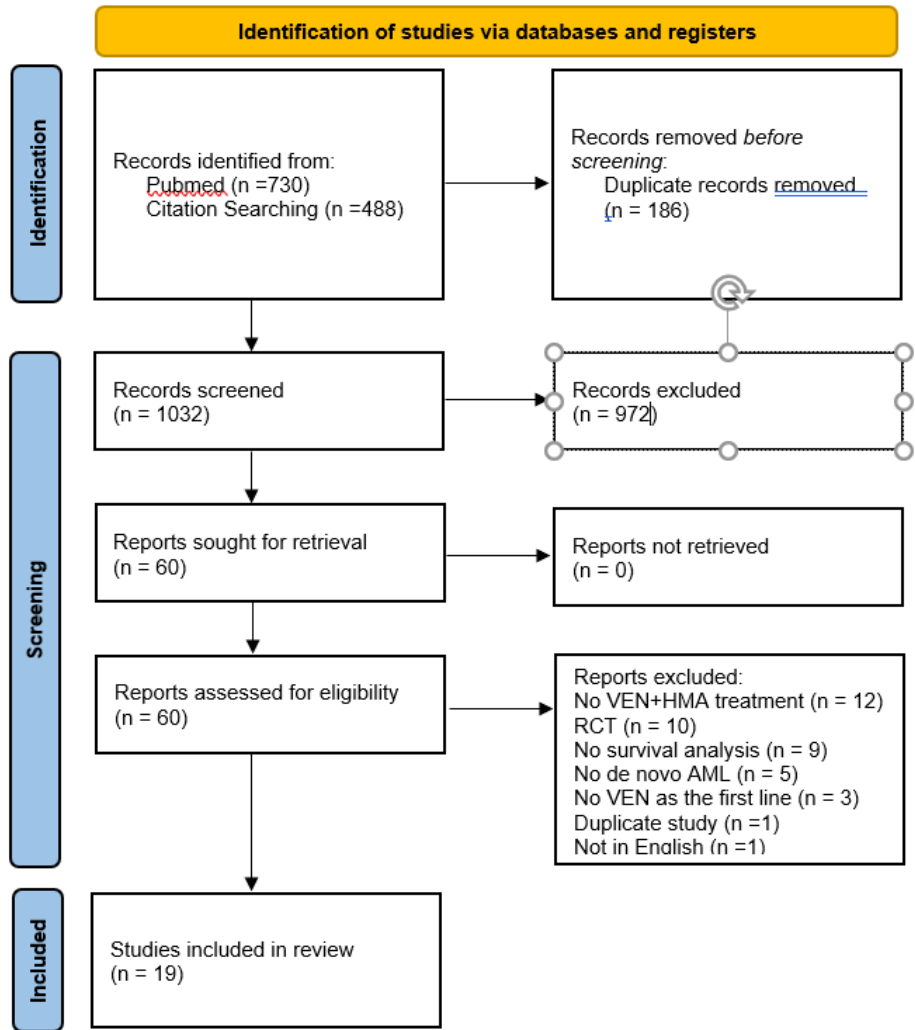

**Figure S1. Flowchart.**

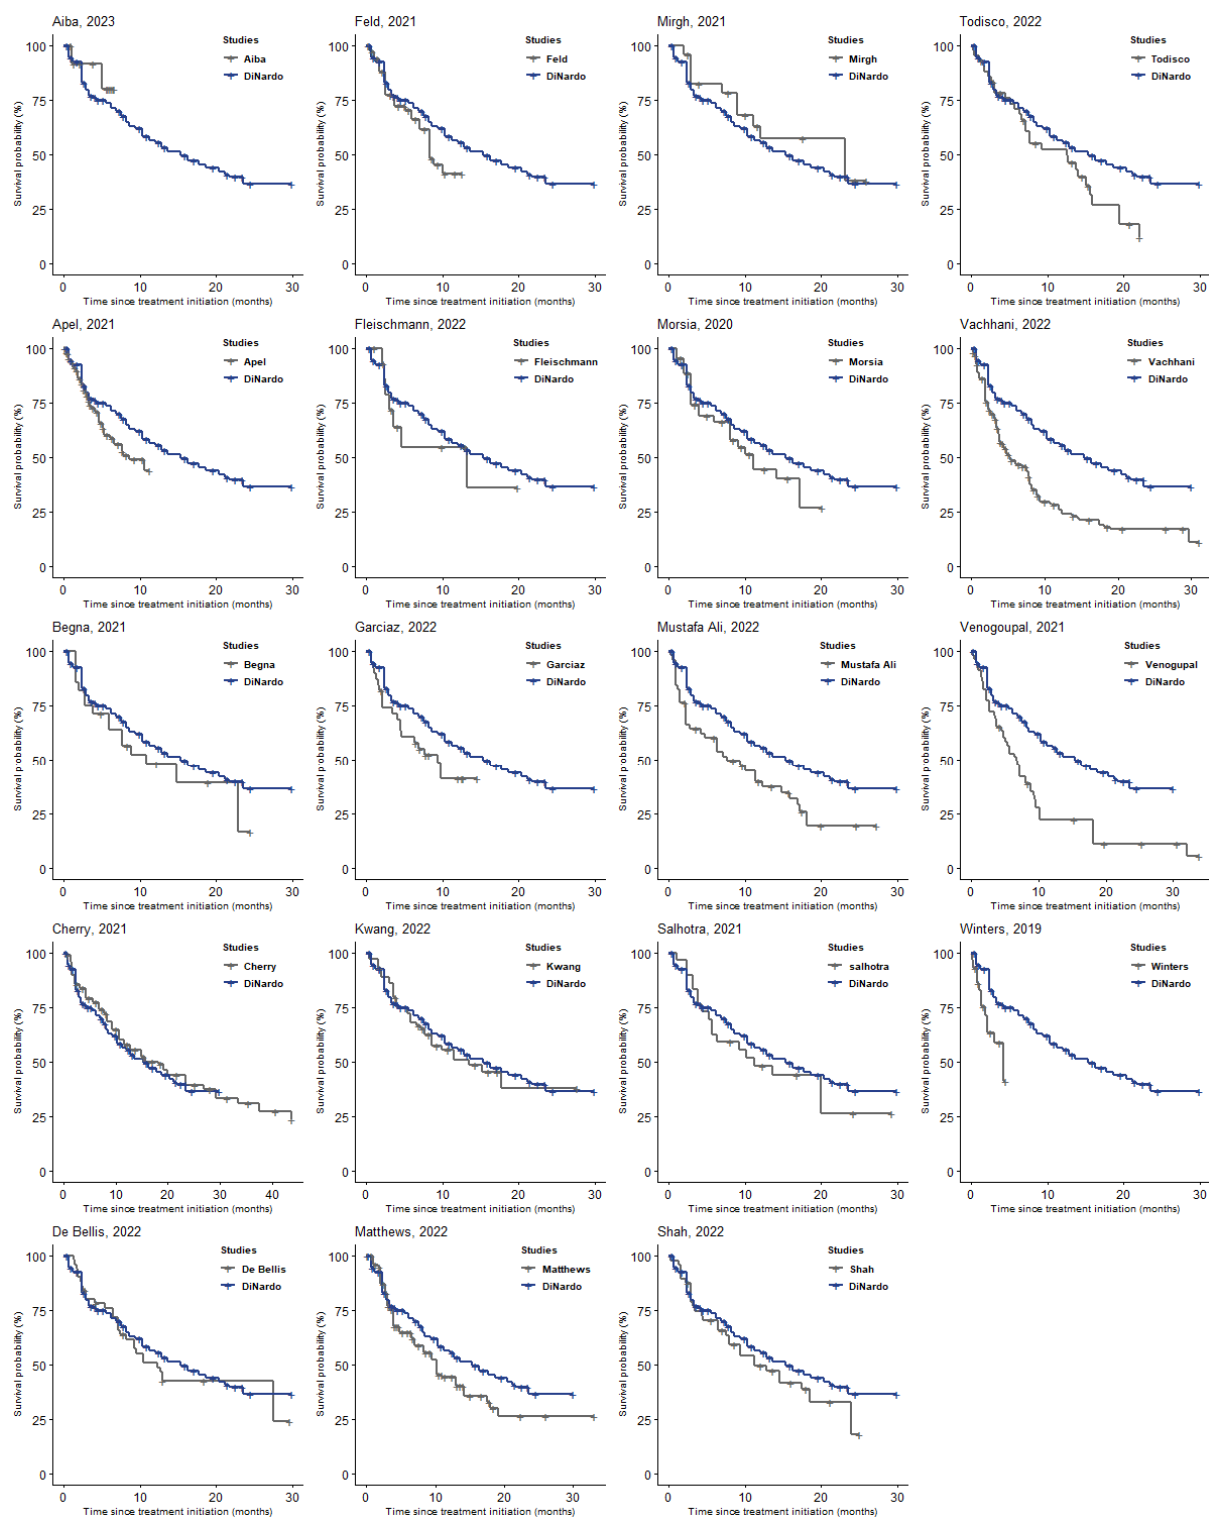

**Figure S2. Pairwise comparisons between the study of DiNardo and the real-world studies.**

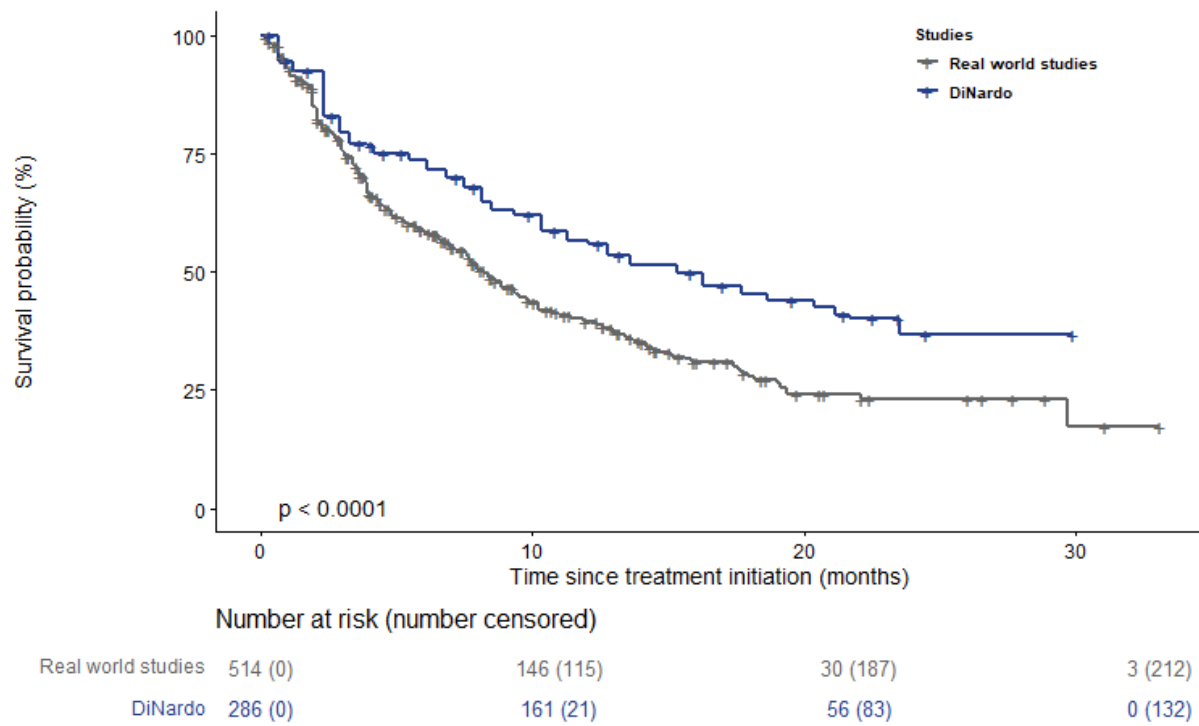

\* the studies of Sahah et al., Salhotra et al. and Venogupal et al. were excluded from this analysis

**Figure S3. Pooled survival curve after the exclusion of high-risk patients \*, compared with that of DiNardo et al.**

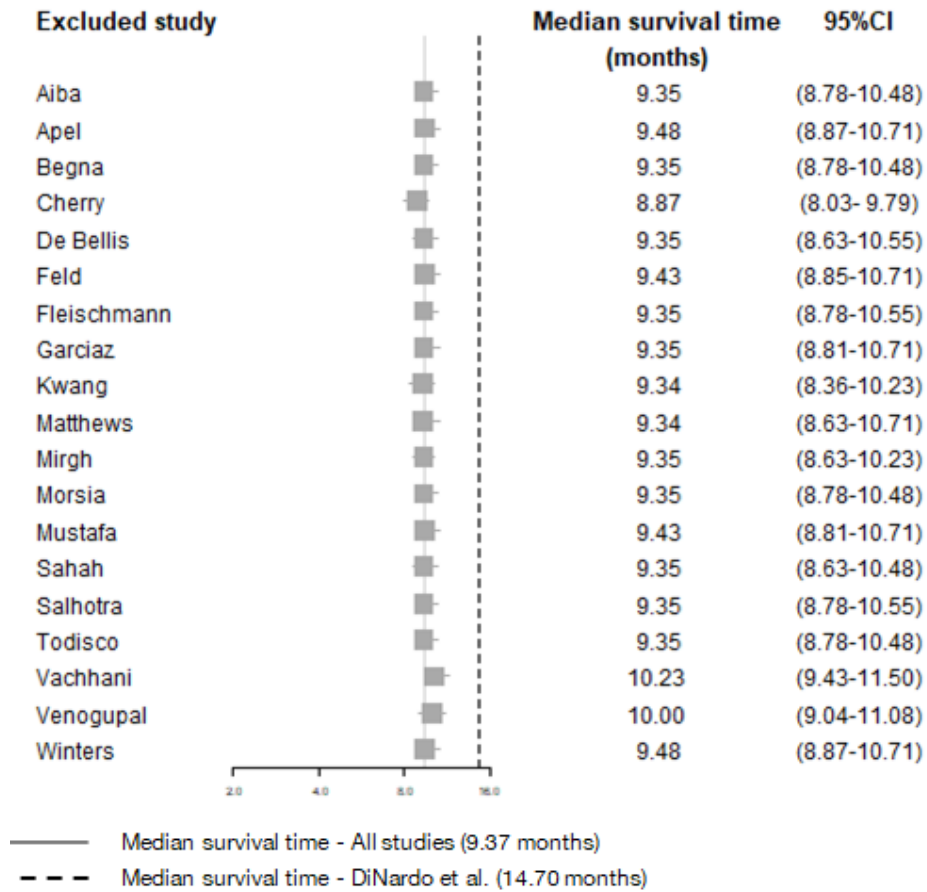

**Figure S4. Leave-one-out analysis.**
